# Supplementary material for: Functionalized Linear Conjugated Polymer/TiO2 Heterojunctions for Significantly Enhancing Photocatalytic H2 Evolution
Source: MDPI journal article supplement (doi:10.3390/molecules29051103), 2024-02-29
Supplement: s1 [file s1]

## Supporting Information

# Functionalized Linear Conjugated Polymer/TiO<sub>2</sub> Heterojunctions for Significantly Enhancing Photocatalytic H<sub>2</sub> Evolution

Hao Gong<sup>†</sup>, Yu-Qin Xing<sup>†</sup>, Jinhua Li <sup>\*</sup> and Shi-Yong Liu <sup>\*</sup>

Jiangxi Provincial Key Laboratory of Functional Molecular Materials Chemistry,  
School of Chemistry and Chemical Engineering, Jiangxi University of Science  
and Technology, Ganzhou 341000, China; 6720210821@mail.jxust.edu.cn (H.  
Gong); xing\_yu\_qin2@sina.com (Y.-Q. Xing)

<sup>\*</sup> Correspondence: lijh@jxust.edu.cn (J. Li); chelsy@jxust.edu.cn or  
chelsy@zju.edu.cn (S.-Y. Liu)

<sup>†</sup> These authors contributed equally to this work.

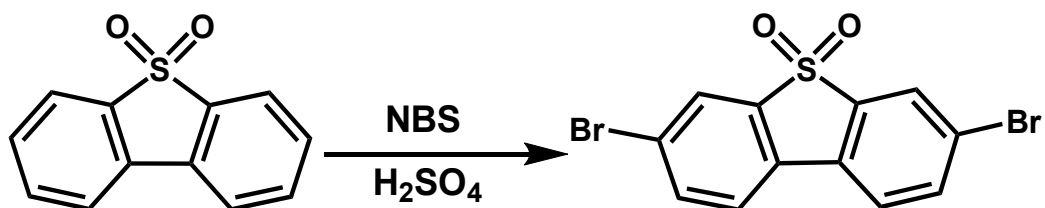

**Scheme S1:** Synthesis of 3,7-dibromodibenzothiophene-S, S-dioxide

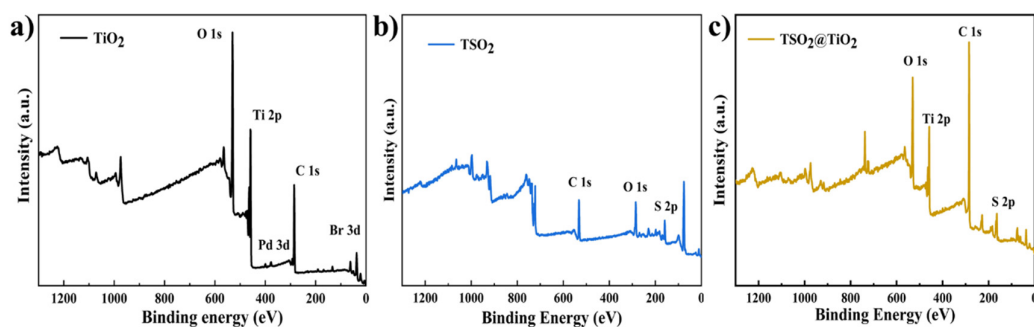

**Figure S1:** XPS plots of  $\text{TiO}_2$ ,  $\text{TSO}_2$  and  $\text{TSO}_2@\text{TiO}_2$

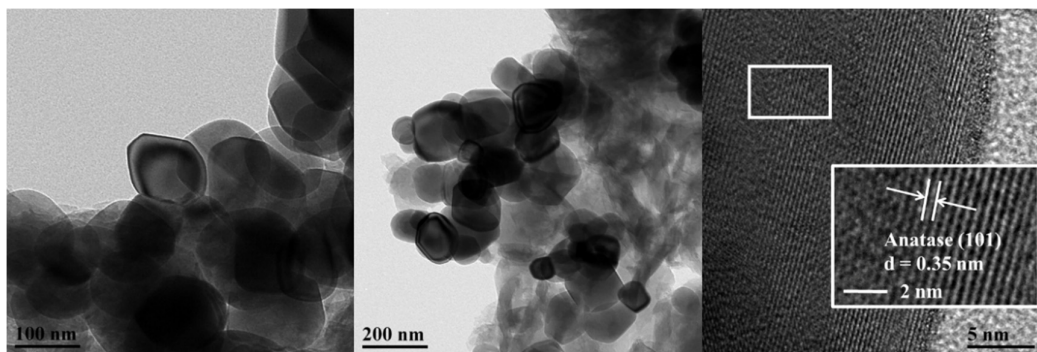

**Figure S2:** TEM plots of  $\text{TSO}_2@\text{TiO}_2$

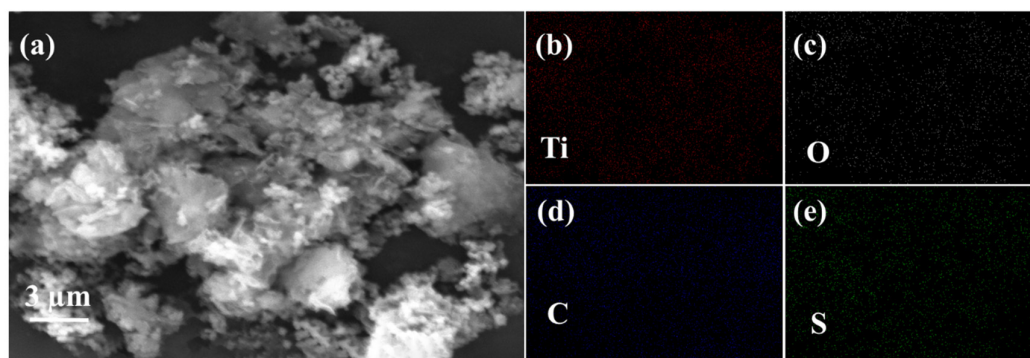

**Figure S3:** EDS plots of  $\text{TSO}_2@\text{TiO}_2$

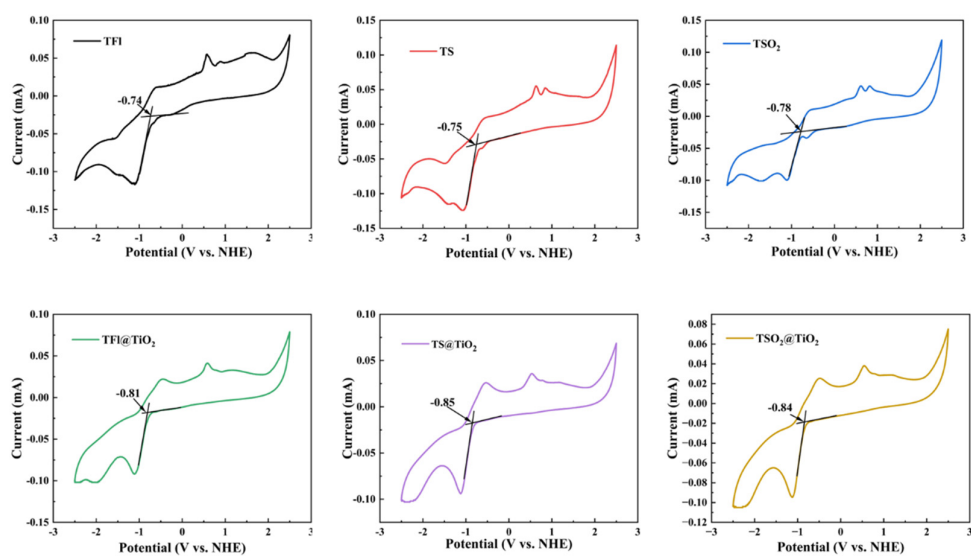

**Figure S4:** CV plots of (a)TFI (b) TS (c)TSO<sub>2</sub> (d)TFI@TiO<sub>2</sub> (e)TS@TiO<sub>2</sub> (f)TSO<sub>2</sub>@TiO<sub>2</sub>
